# Supplementary material for: Isolation of Endogenously Assembled RNA-Protein Complexes Using Affinity Purification Based on Streptavidin Aptamer S1
Source: PubMed Central journal article supplement (PMC4613318; doi:10.3390/ijms160922456), 2015-09-16
Supplement: ijms-16-22456-s001.pdf [file ijms-16-22456-s001.pdf]

# Supplementary Information

## Construction of plasmid pHH21-5-3U-S1

### 5'-3' UTR-S1:

agttgtagtctacgtggaccgacaaagacagattctttgaggagctaaagctcaacgtagtttaacagtttttaattagagagcagatctctgatgaa  
taaccaacgaaaaaggcgagaaatacgcctttcaatatgctgaaacgcgagagaaaccgcgtgtagGAATTCaaggcaaaactaacatga  
aacaaggctagaagtcaggtcggattaagccatagtagcggaaaaactatgctacctgtgagccccgtccaaggacgttaaaagaagtcaggccat  
tacaatgccatagcttgagtaaaactgtgcagcctgtagctccacctgagaaggtgtaaaaaatctgggaggccacaaacctggaagctgtacgca  
tggcgtagtgactagcggtagaggagaccctcccttacaatcgcagcaacaatgggggccaaggtgagatgaagctgtagtctactgga  
ggactagaggttagaggagaccccccaaaaaaacagcatattgacgctgggaaagaccagagatcctgctgtctcctcagcatcattccag  
gcacagaacgccagaaaaatggaatggtgctgttgaatcaacaggtctGGATCCATGGGACCGACCAGAATCATGCAA  
GTGCGTAAGATAGTCGCGGGCCGGGCCATG

GAATTC highlighted with red color is the link of 5' and 3' UTR.

GGATCCATGGGACCGACCAGAATCATGCAAGTGTGCGTAAGATAGTCGCGGGCCGGGCCATG  
G highlighted with yellow color is the sequence of Bio Aptamer S1.

### 5' UTR-F-T7

TAATACGACTCACTATAGGGagttgtagtctacgtggac

### 3' UTR-R-S1:

CATGGCCCGGCCGCGACTATCTTACGCACTTGCATGATTCTGGTCGGTCCCATGGATCCa  
gaacctgtgattcaacagc

### The restriction sites of vector pHH21:

CGTCTCNTATTAGTAGAA....TTTTGCTCCNGAGACG  
GCAGAGNATAATCATCTT....AAAACGAGGGNCTCTGC

### pHH21-5'-3' U-S1

CGTCTCCTATTagttgtagtctacgtggaccgacaaagacagattctttgaggagctaaagctcaacgtagtttaacagtttttaattagag  
agcagatctctgatgaataaccaacgaaaaaggcgagaaatacgcctttcaatatgctgaaacgcgagagaaaccgcgtgtagGAATTCaa  
ggcaaaactaacatgaacaaggctagaagtcaggtcggattaagccatagtagcggaaaaactatgctacctgtgagccccgtccaaggacgtta  
aaagaagtcaggccattacaaatgccatagcttgagtaaaactgtgcagcctgtagctccacctgagaaggtgtaaaaaatctgggaggccacaaac  
catggaagctgtacgcatggcgtagtgactagcggtagaggagaccctcccttacaatcgcagcaacaatgggggccaaggtgagatgaa  
gctgtagtctactggaaggactagaggttagaggagaccccccaaaaaaacagcatattgacgctgggaaagaccagagatcctgctgt  
ctcctcagcatcattccaggcacagaacgccagaaaaatggaatggtgctgttgaatcaacaggtctGGATCCATGGGACCGACCA  
GAATCATGCAAGTGTGCGTAAGATAGTCGCGGGCCGGGCCATGCCCGGAGACG

### The primers used to clone the 5'-3' UTR-S1 into pHH21.

5' UTR-F-BsmB:

5'-CGTCTCCTATTAGTTGTTAGTCTACGTGGAC-3'

3' UTR-Bio-R-BsmB:

5'-CGTCTCCGGGCATGGCCCGGCCGCGACTATC-3'

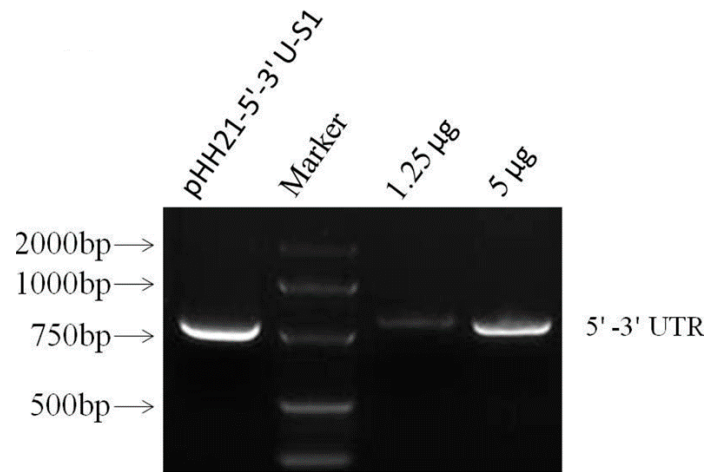

**Figure S1.** The RNA used in Figure 1D was reverse transcript to cDNA, and then was subjected to PCR using primers of 5' UTR-F and 3' UTR-R. The bands at around 750 bp proved that the DENV-UTR construct is transcribed as one intact RNA.

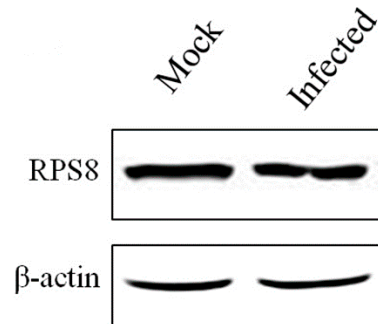

**Figure S2.** The protein level of RPS8 in DENV mock-infected and infected cells was assayed with western blotting using antibody against RPS8, and  $\beta$ -actin act as internal control. The result showed that there was no statistical difference between the two groups.

**Tabel S1.** The  $C_t$  value of RT-qPCR in the Figure 1D.

| Group        | $\beta$ -Actin | 5'-3' UTR |
|--------------|----------------|-----------|
| 1.25 $\mu$ g | 17.78          | 18.36     |
| 2.5 $\mu$ g  | 17.95          | 17.96     |
| 5 $\mu$ g    | 17.85          | 17.75     |
